# Supplementary material for: Effectiveness and safety of sorafenib in the treatment of unresectable and advanced intrahepatic cholangiocarcinoma: a pilot study
Source: PubMed Central journal article supplement (PMC5370037; doi:10.18632/oncotarget.12825), 2016-10-23
Supplement: oncotarget-08-17246-s001.pdf [file oncotarget-08-17246-s001.pdf]

## Effectiveness and safety of sorafenib in the treatment of unresectable and advanced intrahepatic cholangiocarcinoma: a pilot study

### Supplementary Material

**Supplemental Table 1. Summary of the median time for OS, TTP, and PFS among the studies assessing various treatments in patients with ICC**

| Authors         | n   | Treatment                                                     | OS (months)                           |                  | TTP (months)    | PFS (months)           |                  |
|-----------------|-----|---------------------------------------------------------------|---------------------------------------|------------------|-----------------|------------------------|------------------|
|                 |     |                                                               | Median (95% CI)                       | HR (95% CI)      | Median (95% CI) | Median (95% CI)        | HR (95% CI)      |
| This study      | 44  | 400 mg of oral Sorafenib, twice daily                         | 5.7 (3.7-8.5)                         |                  | 5.6 (2.9-NA)    | 3.2 (2.4-4.1)          |                  |
| Moehler M, 2014 | 97  | 49 Gemcitabine+Sorafenib                                      | 8.4                                   |                  |                 | 3.0 (1.8-7.2)          | 1.28 (0.91-2.02) |
|                 |     | 48 Gemcitabine + Placebo                                      | 11.2, p=0.775                         |                  |                 | 4.9 (3.5-7.7, p=0.859) |                  |
| Valle, 2014     | 493 | Cisplatin +Gemcitabine<br>Gemcitabine                         | No data for overall<br>(a meta study) | 0.65 (0.54-0.78) |                 |                        | 0.64 (0.53-0.76) |
| Lee JK, 2013    | 39  | Gemcitabine+ cisplatin+ sorafenib                             | 14.4 (11.6-19.2)                      |                  | 8.2 (6.5-12)    | 6.5 (3.5 - 8.3)        |                  |
| Kim YI, 2013    | 92  | 67 Capecitabin+Cisplatin vs.<br>25 Capecitabin+Cisplatin+CCRT | 6.2 vs. 9.3, p=0.048                  |                  |                 | 1.9 vs. 4.3, p=0.001   |                  |
|                 |     | Overall                                                       | 7.9 (5.8 - 10)                        |                  |                 | 2.6 (2.0-3.2)          |                  |

|                      |     |                                                 |                                                                                                          |                  |                                                                                            |                    |
|----------------------|-----|-------------------------------------------------|----------------------------------------------------------------------------------------------------------|------------------|--------------------------------------------------------------------------------------------|--------------------|
| El-Khoueiry AB, 2011 | 31  | Sorafenib                                       | 9 (4-12)                                                                                                 |                  | 3 (2-4)                                                                                    |                    |
| Bengala C, 2010      | 46  | Sorafenib                                       | 4.4 (range: 0-22)                                                                                        |                  | 2.3 (range: 0-12)                                                                          |                    |
| Okusaka, 2010        | 83  | 41 Cisplatin + Gemcitabine                      | 11.2                                                                                                     | 0.69 (0.41-1.13) | 5.8                                                                                        | 0.66 (0.41-1.05)   |
|                      |     | 42 Gemcitabine                                  | 7.7                                                                                                      |                  | 3.7                                                                                        |                    |
| Valle, 2010          | 410 | 204 Cisplatin + Gemcitabine vs. 206 Gemcitabine | 11.7 (9.5-14.3) vs. 8.1 (7.1-8.7)                                                                        | 0.64 (0.52-0.80) | 8.0 (6.6-8.6) vs. 5.0 (4.0-5.9)                                                            | 0.63 (0.51 - 0.77) |
| Okusaka, 2006        | 40  | Gemcitabine                                     | 7.6 (5.4-9.3)                                                                                            |                  | 2.6 (1.7 - 3.8)                                                                            |                    |
| Tsavaris, 2004       | 30  | Gemcitabine                                     | 14 (13.3-16)                                                                                             | 7 (4.5-6.0)      | 7 (range: 5-34)                                                                            |                    |
| Alberts, 2002        | 36  | Irinotecan                                      | 1.6 (range: 1.3-11.6)                                                                                    |                  |                                                                                            |                    |
|                      | 34  | Irinotecan                                      | <u>11 biliary patients:</u> 6.1 (range: 5.9-8.7)<br><u>23 gallbladder patients:</u> 7.0 (range: 3.7-8.4) |                  | <u>11 biliary patients:</u> 3.2 (1.4-4.4)<br><u>23 gallbladder patients:</u> 2.7 (1.7-3.3) |                    |
| Penz, 2001           | 32  | Gemcitabine                                     | 11.5 (range: 3-24)                                                                                       |                  | 5.6 (range: 1.8-13)                                                                        |                    |

Abbreviations: OS, overall survival; TTP, time to progression; PFS, progression-free survival; HR, hazard ration, CI, confidence intervals; CCRT, computerized controlled radiation therapy.

**Supplemental Table 2. Summary of the adverse events among three studies assessing various treatments in patients with ICC**

| Items of adverse events            | This study  | Bengala C, 2010 | Anthony B, 2011 |
|------------------------------------|-------------|-----------------|-----------------|
|                                    | <b>N=44</b> | <b>N=46</b>     | <b>N=31</b>     |
| <b>Rash</b>                        | 11 (25.0)   | 16 (35)         | 2 (6)           |
| <b>Hand and foot skin reaction</b> | 15 (34.1)   | 8 (17)          | 4 (13)          |
| <b>Gastrointestinal</b>            |             |                 |                 |
| Diarrhea                           | 19 (43.2)   | 4 (8)           | -               |
| Stomatitis                         | 3 (6.8)     | 4 (8)           | -               |
| Nausea/vomiting                    | 6 (13.6)    | 4 (8)           | 4 (13)          |
| Liver enzyme                       | -           | 3(6)            | -               |
| <b>Hematological</b>               |             |                 |                 |
| Anemia                             | 1 (2.3)     | 3 (6)           | -               |
| Thrombocytopenia                   | 6 (13.6)    | 11 (24)         | -               |
| Lymphopenia                        | 1 (2.3)     | -               | -               |
| Haematemesis                       | 1 (2.3)     | -               | -               |
| Leukopenia                         | 3 (6.8)     | -               | -               |
| <b>Systemic symptoms</b>           |             |                 |                 |
| Fatigue                            | 15 (34.1)   | 15 (33)         | 2 (6)           |
| <b>Infection</b>                   | -           | 1 (2)           | -               |
| <b>Cardiovascular</b>              |             |                 |                 |
| Deep vein thrombosis               | -           | 1 (2)           | -               |
| Pulmonary embolism                 | -           | 2 (4)           | -               |
| Cardiac ischemia                   | -           | 1 (2)           | -               |
| <b>Coagulation (DIC)</b>           | -           | 1 (2)           | -               |
| <b>Hemorrhage/bleeding</b>         | -           | 1 (2)           | -               |
| <b>Gastrointestinal bleeding</b>   | -           | -               | 2 (6)           |
| <b>Metabolic/laboratory</b>        | -           | 6 (13)          | -               |
| <b>Non-hematologic</b>             |             |                 |                 |
| Venous thromboembolism             | -           | -               | 3 (10)          |
| AST/ALT elevation                  | -           | -               | 3 (10)          |
| Elevated lipase                    | 1 (2.3)     | -               | -               |
| Elevated bilirubin                 | 1 (2.3)     | -               | 4 (13)          |
| Elevated direct bilirubin          | 1 (2.3)     | -               | -               |
| Elevated total protein             | 1 (2.3)     | -               | -               |
| Elevated transaminase              | 4 (9.1)     | -               | -               |
| Loss of appetite                   | 11 (25.0)   | -               | -               |
| Hair loss                          | 5 (11.4)    | -               | -               |
| Constipation                       | 2 (4.5)     | -               | -               |
| Fever                              | 2 (4.5)     | -               | -               |
| Hypertension                       | 2 (4.5)     | -               | 2 (6)           |

|                              |         |   |        |
|------------------------------|---------|---|--------|
| Joint pain                   | 2 (4.5) | - | -      |
| oral ulcer                   | 2 (4.5) | - | -      |
| Low blood chloride           | 1 (2.3) | - | -      |
| Hypernatremia                | 1 (2.3) | - | -      |
| Leptotrichia                 | 1 (2.3) | - | -      |
| Ear discomfort               | 1 (2.3) | - | -      |
| Jaundice, elevated bilirubin | 1 (2.3) | - | -      |
| Yellow skin / sclera         | 1 (2.3) | - | -      |
| Body weight loss             | 1 (2.3) | - | -      |
| Headache                     | 1 (2.3) | - | -      |
| Bloody stools                | 1 (2.3) | - | -      |
| Lower back radiating pain    | 1 (2.3) | - | -      |
| Waist and abdominal pain     | 1 (2.3) | - | 3 (10) |
| Scrotal skin lesions         | 1 (2.3) | - | -      |

---

**Results were summarized as n(%).**
